# Supplementary material for: Differential Effects of Hypoxia versus Hyperoxia or Physoxia on Phenotype and Energy Metabolism in Human Chondrocytes from Osteoarthritic Compared to Macroscopically Normal Cartilage
Source: MDPI journal article supplement (doi:10.3390/ijms24087532), 2023-04-19
Supplement: s1 [file s1]

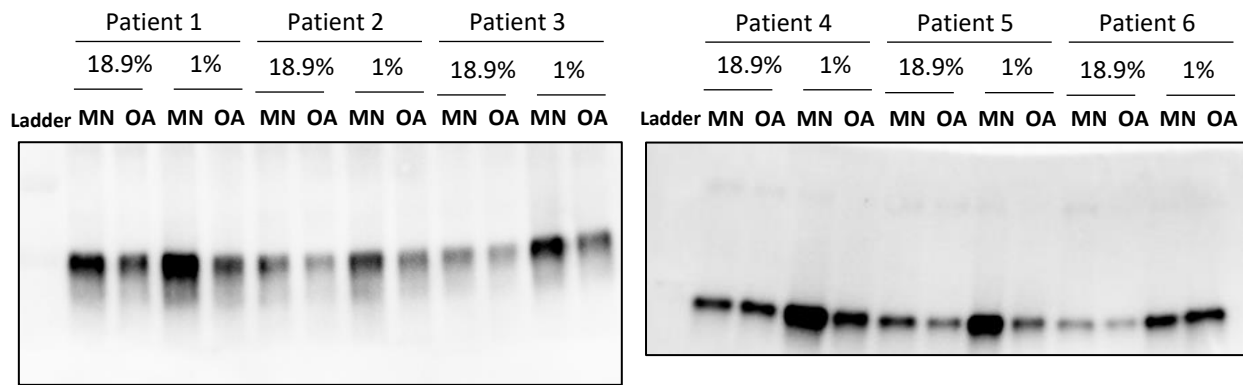

**Figure 3A**

**SOX9 (~70KDa)**

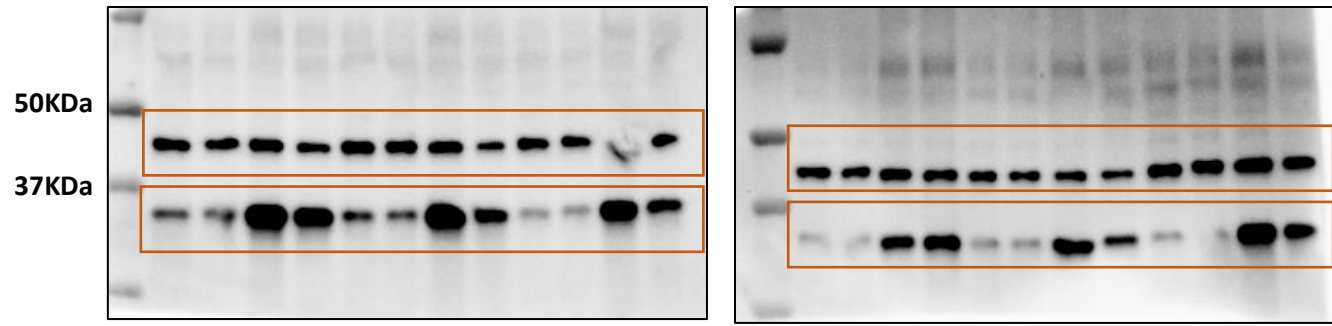

**β-actin (~43KDa)**

**LDHA (~36KDa)**

**Figure 6A**

|        | Patient 1 |    | Patient 2 |    | Patient 3 |    | Patient 4 |    | Patient 5 |    | Patient 6 |    |
|--------|-----------|----|-----------|----|-----------|----|-----------|----|-----------|----|-----------|----|
|        | 18.9%     | 1% | 18.9%     | 1% | 18.9%     | 1% | 18.9%     | 1% | 18.9%     | 1% | 18.9%     | 1% |
| Ladder | MN        | OA |

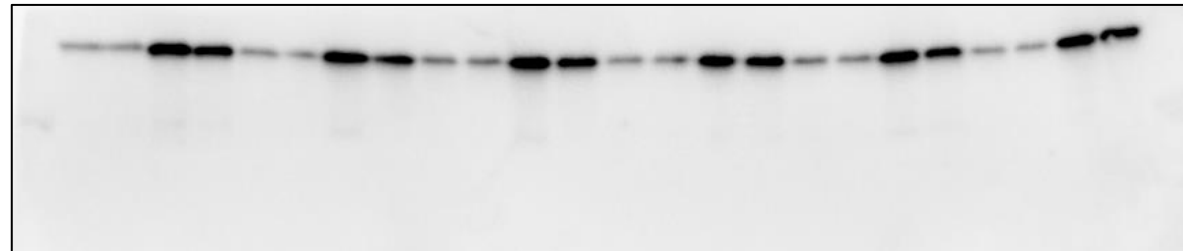

HIF1α (~100KDa)

Figure 6C

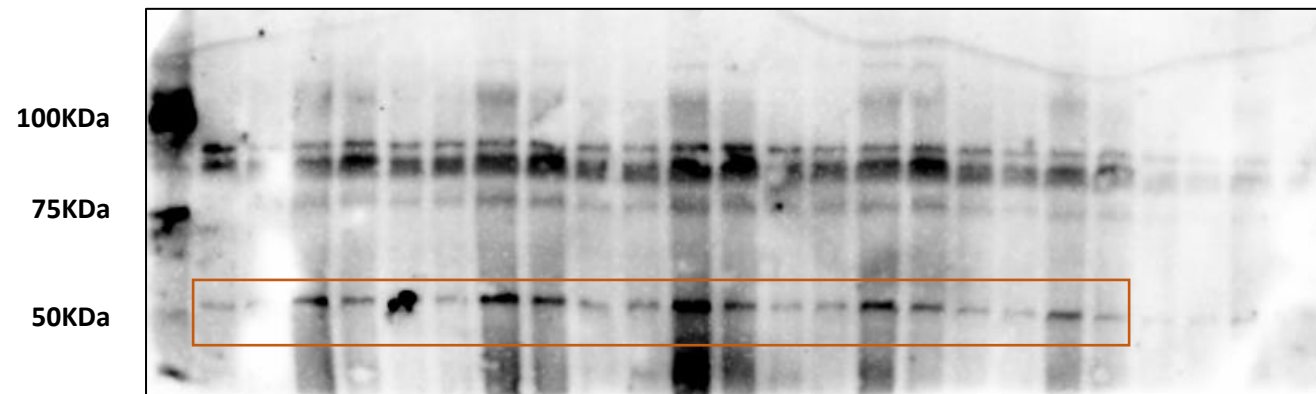

GLUT1 (~54KDa)

Figure 4E

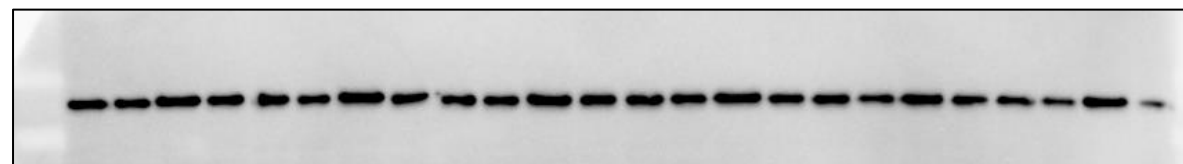

β-actin (~43KDa)

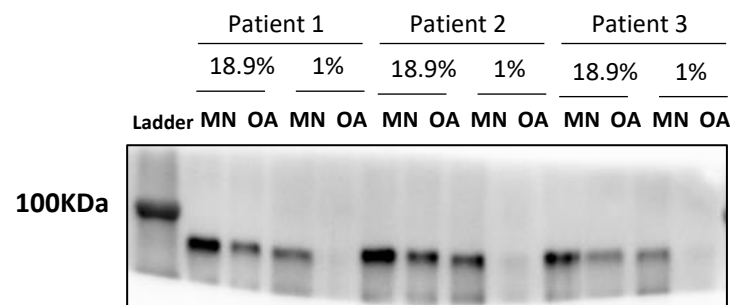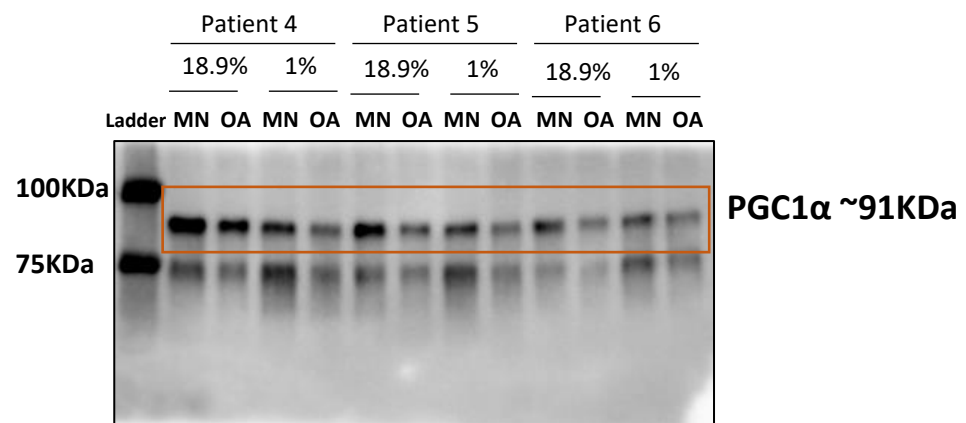

Figure 7D

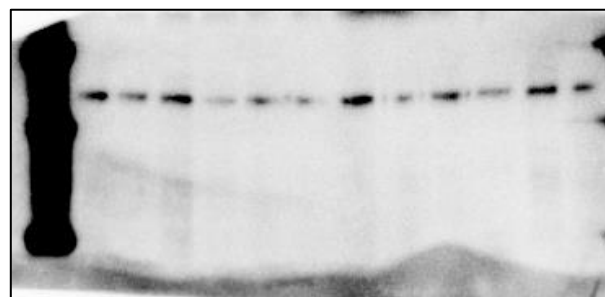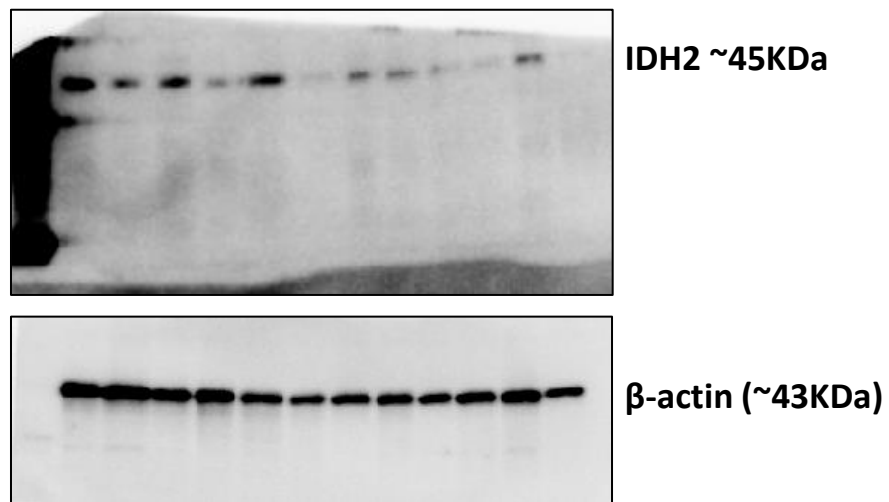

Figure 8E

Figure S1. Full length Western blot images.

**Table S1 Sequences for primers used for real time PCR.**

|               | Sequence (5'-3')                                                 |
|---------------|------------------------------------------------------------------|
| SOX9          | CTG GGC AAG CTC TGG AG<br>CGT TCT TCA CCG ACT TCC TC             |
| COL2A1        | CCT CAA GGA TTT CAA GGC AAT<br>GTT TTC CAG CTT CAC CAT CAT C     |
| ACAN          | AGA TTC ACA GAA CTC CAG TGC<br>ACC TAC GAT GTC TAC TGC TTT G     |
| MMP13         | TTA AGG AGC ATG GCG ACT TCT AC<br>CCC AGG AGG AAA AGC ATG AG     |
| ADAMTS5       | CAC TAC GAT GCA GCT ATC CTG<br>AAC ATA TGG TCC CAA CGT CTG       |
| GLUT1         | GTG CCA TAC TCA TGA CCA TCG<br>GGC CAC AAA GCC AAA GAT G         |
| LDHA          | GAC ATC AGA AGA CTT TAA AAT TGC AG<br>ATG TTG CTG GTG TCT CTC TG |
| PGK1          | GAC AGC AGC CTT AAT CCT CTG<br>CTA ACA AGC TGA CGC TGG A         |
| PGC1 $\alpha$ | TGT CTG TAT CCA AGT CGT TCA C<br>GAG TCT GTA TGG AGT GAC ATC G   |
| IDH1          | CTG CTT CTA CTG TCT TGC CA<br>ACT ATG ATG GTG ACG TGC AG         |
| IDH2          | CCT CAA TCG TCT TCC CAT CAG<br>GCT CAG GTC CTC AAG TCT TC        |
